# Supplementary material for: Two C2v symmetry dysprosium(iii) single-molecule magnets with effective energy barriers over 600 K
Source: Royal Society of Chemistry journal article supplement (doi:10.1039/d1qi00145k), 2021-01-01
Supplement: d1qi00145k1.pdf [file d1qi00145k1.pdf]

Electronic Supplementary Information for

# Two $C_{2v}$ Symmetry Dysprosium(III) Single-Molecule Magnets with Effective Energy Barriers over 600 K

*Xixi Meng,<sup>a</sup> Mengmeng Wang,<sup>a</sup> Xiaoshuang Gou,<sup>a</sup> Wenlong Lan,<sup>a</sup> Kexin Jia,<sup>a</sup> Yu-Xia*

*Wang,<sup>a</sup> Yi-Quan Zhang,<sup>\*b</sup> Wei Shi<sup>\*a</sup> and Peng Cheng<sup>a</sup>*

<sup>a</sup>Department of Chemistry and Key Laboratory of Advanced Energy Materials Chemistry (MOE), College of Chemistry, Nankai University, Tianjin 300071, China.

<sup>b</sup>Jiangsu Key Lab for NSLSCS, School of Physical Science and Technology, Nanjing Normal University, Nanjing 210023, P. R. China

E-mail: [shiwei@nankai.edu.cn](mailto:shiwei@nankai.edu.cn); [zhangyiquan@njnu.edu.cn](mailto:zhangyiquan@njnu.edu.cn)

## Table of Contents

|                                    |     |
|------------------------------------|-----|
| 1. Experimental Section .....      | S2  |
| 2. Structural Figures .....        | S5  |
| 3. PXRD and TGA .....              | S7  |
| 4. Magnetic Characterizations..... | S9  |
| 5. Tables .....                    | S17 |
| 6. References .....                | S26 |

## S1. Experimental Section

**X-ray Crystallography.** The single crystal of **1** or **2** covered with grease was mounted on a Rigaku XtaLAB Mini II single-crystal diffractometer with graphite-monochromatic Mo-K $\alpha$  radiation ( $\lambda = 0.71073 \text{ \AA}$ ). The data were measured by  $\omega$ -scan mode. The structures were solved by the direct methods with SHELXS and refined by full-matrix least-squares techniques against  $F^2$  (SHELXL-2014) using the program package Olex-2 software.<sup>1</sup> All the non-hydrogen atoms were refined with anisotropic thermal parameters. All hydrogen atoms were placed in calculated positions and a riding model was used. Crystallographic data and refinement for **1** and **2** are listed in Table S1†. CCDC 2055350 and 2055351 for **1** and **2**, respectively, are offered in the Cambridge Crystallographic Data Centre.

**Computational Details.** Complete-active-space self-consistent field (CASSCF) calculations on mononuclear **1** and **2** on the basis of single-crystal X-ray determined geometry have been carried out with MOLCAS 8.4<sup>2</sup> program package (see Fig. S25† for the calculated complete structures of **1** and **2**). The basis sets for all atoms are atomic natural orbitals from the MOLCAS ANO-RCC library: ANO-RCC-VTZP for Dy<sup>III</sup>; VTZ for close N, O, Cl and Br; VDZ for distant atoms. The calculations employed the second order Douglas-Kroll-Hess Hamiltonian, where scalar relativistic contractions were considered in the basis set and the spin-orbit couplings were handled separately in the restricted active space state interaction (RASSI-SO) procedure. Active electrons in 7 active orbitals include all  $f$  electrons (CAS(9 in 7) in the CASSCF calculation. To exclude all the doubts, we calculated all the roots in the active space. We have mixed the maximum number of spin-free state which was possible with our hardware (all from 21 sextets, 128 from 224 quadruplets, 130 from 490 doublets for Dy<sup>III</sup>). SINGLE\_ANISO<sup>3</sup> program was used to obtain the energy levels,  $g$  tensors, magnetic axes, et al., based on the above CASSCF/RASSI-SO calculations.

**Material and methods.** Anhydrous DyCl<sub>3</sub> and DyBr<sub>3</sub> were purchased from Alfa Aesar and used as received. Ethanol, acetonitrile and tetrahydrofuran were dried using a commercial solvent purification system designed by MIKROUNA Solvent Systems

and stored over 4 Å molecular sieves. All reactions were performed in an argon filled glovebox or under an argon atmosphere using Schlenk techniques, and all operations described below were performed under aerobic conditions. The ligand 2,2'-(((pyridine-2,6-diylbis(methylene))bis((pyridin-2-yl-methyl)azanediyl))-bis(methylene)diphenol (H<sub>2</sub>L) was prepared according to the reported methods.<sup>4</sup> Elemental analyses (C, H, N) were measured on a Perkin-Elmer elemental analyzer. The Fourier transform infrared (FTIR) spectra were measured in the range of 400-4000 cm<sup>-1</sup> on a Bruker ALPHA FTIR spectrophotometer equipped with an attenuated total reflectance accessory. Powder X-ray diffraction (PXRD) measurements were carried out on a Rigaku Smartlab SE X-ray diffractometer using Cu-Kα radiation to verify the phase purity of the polycrystalline samples. Thermogravimetric analysis (TGA) was performed in a Mettler Toledo TGA 2 apparatus with a heating rate of 10 °C / min in nitrogen atmosphere. Magnetic measurements for all the samples were performed on a Quantum Design SQUID MPMS VSM magnetometer in the temperature range of 2-300 K. The measurements were performed on polycrystalline samples. The temperature dependences of the magnetization were conducted from 300 to 2 K in an applied 1000 Oe dc field, and the measured susceptibilities were corrected for the diamagnetic contribution of the sample holder and sample by using Pascal's tables. The field dependences of the magnetization were collected at several temperatures between 2 and 7 K with dc magnetic field up to 7 T. Alternating-current (ac) measurements were performed on at various frequencies ranging from 1 to 1000 Hz with a 3 Oe oscillating ac field.

**Synthesis of [DyLCl]·CH<sub>3</sub>CH<sub>2</sub>OH (1).** To a solution of DyCl<sub>3</sub> (27 mg, 0.1 mmol) and H<sub>2</sub>L (53 mg, 0.1 mmol) in ethanol (3 mL), triethylamine (28 μL, 0.2 mmol) was dropwise added. After stirring for 30 min, the resulting mixture was filtrated, and the filtrate was left at room temperature for slow evaporation. Colorless block crystals available for single crystal X-ray diffraction formed after one days. The crystals were obtained by filtration in 56 % yield (based on Dy<sup>III</sup> salts). Elemental analysis for **1**: Calcd (%): C 54.40, H 4.57, N 9.33; found: C 54.62, H 4.86, N 9.28. FTIR: 3435(w),

2968(w), 1593(m), 1476(s), 1439(s), 1291(s), 1156(w), 1051(m), 1005(s), 961(m), 879(m), 787(m), 771(s), 751(s), 582(s), 478(s)  $\text{cm}^{-1}$ .

**Synthesis of [DyLBr]·2THF (2).** To a solution of H<sub>2</sub>L (53 mg, 0.1 mmol) in tetrahydrofuran (3 mL), triethylamine (28  $\mu\text{L}$ , 0.2 mmol) was added. After stirring for 5 min, the anhydrous DyBr<sub>3</sub> (40 mg, 0.1 mmol) solid was added, which was sealed in a 10 mL vial at 65 °C for 12 h, and then slowly cooled to room temperature by 10 °C / h. Colorless block crystals were formed with a yield of 37% (based on Dy<sup>III</sup> salts). Elemental analysis for **2**: Calcd (%): C 53.75, H 5.17, N 7.64; Found: C 53.96, H 5.63, N 7.57. FT-IR: 2933(w), 2675(w), 1595(m), 1476(s), 1442(s), 1295(s), 1159(w), 1067(w), 1005(w), 960(w), 887(m), 842(w), 751(m), 582(w), 478(w)  $\text{cm}^{-1}$ .

## S2. Structural figures

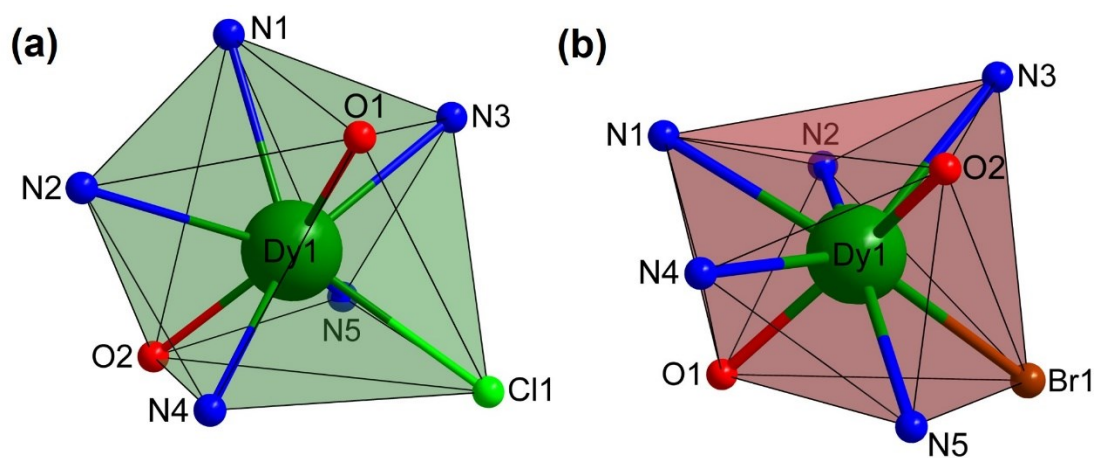

**Fig. S1** The coordination environments of Dy<sup>III</sup> ions in **1** (a) and **2** (b).

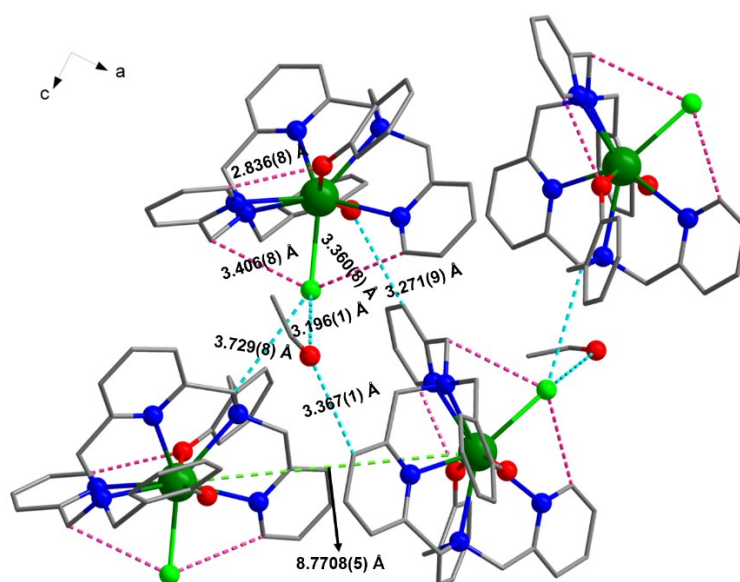

**Fig. S2** Packing diagram of **1**. Hydrogen atoms and solvent molecules are omitted for clarity. Dy, green; N, blue; O, red; Cl, bright green; C, grey. The green, cyan and rosy dashed lines represent the distances between nearest neighboring Dy<sup>III</sup> centers, intermolecular hydrogen bonds (O3 $\cdots$ H3 $\cdots$ Cl1 3.196(1) Å, C4 $\cdots$ H4b $\cdots$ Cl1 3.729(8) Å, C18 $\cdots$ H18 $\cdots$ O3 3.367(1) Å, C30 $\cdots$ H30 $\cdots$ O1 3.271(9) Å) and intramolecular hydrogen bonds (C17 $\cdots$ H17 $\cdots$ Cl1 3.367(1) Å, C28 $\cdots$ H28a $\cdots$ Cl1 3.406(8) Å, C33 $\cdots$ H33 $\cdots$ O2 2.836(8) Å), respectively.

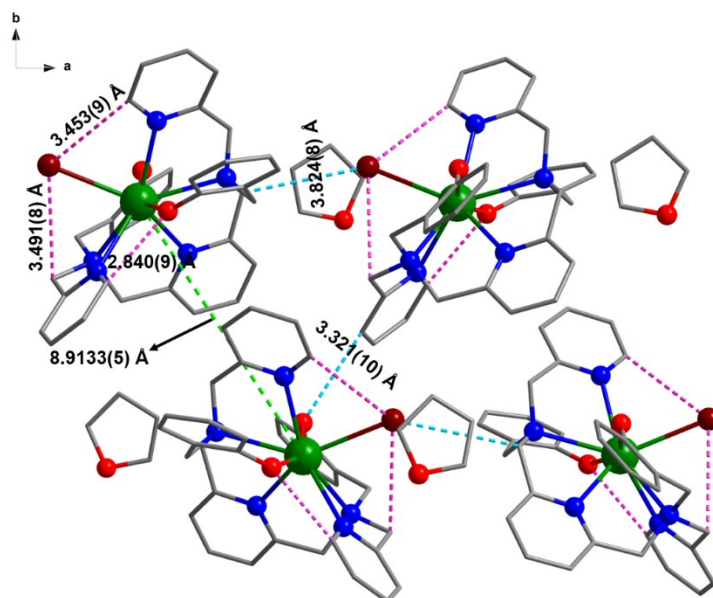

**Fig. S3** Packing diagram of **2**. Hydrogen atoms are omitted for clarity. Dy, green; N, blue; O, red; Br, sorrel; C, grey. The green, cyan and violet dashed line represents the distances between nearest neighboring Dy<sup>III</sup> centers, intermolecular hydrogen bonds (O10···H10···O1 3.321(10) Å, C20···H20a···Br1 3.824(8) Å, and intramolecular hydrogen bonds (C8···H8b···Br1 3.491(8) Å, C13···H13···O2 2.840(9) Å, C33···H33···Br1 3.453(9) Å), respectively.

### S3. PXRD and TGA

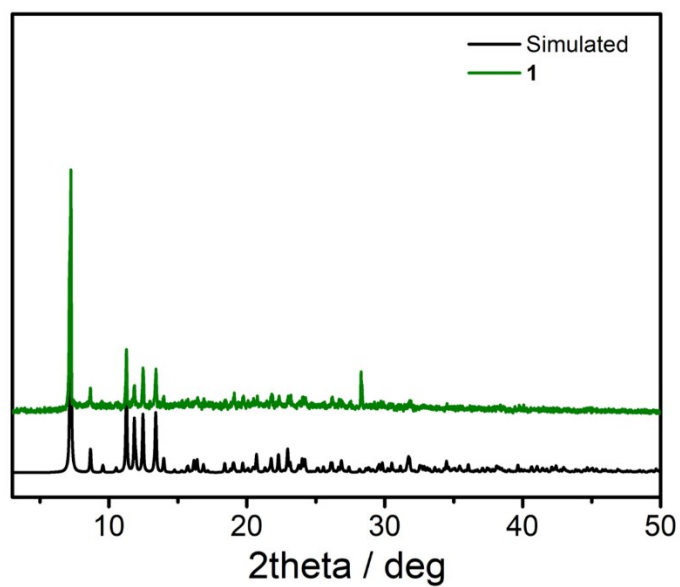

Fig. S4 PXRD pattern of 1.

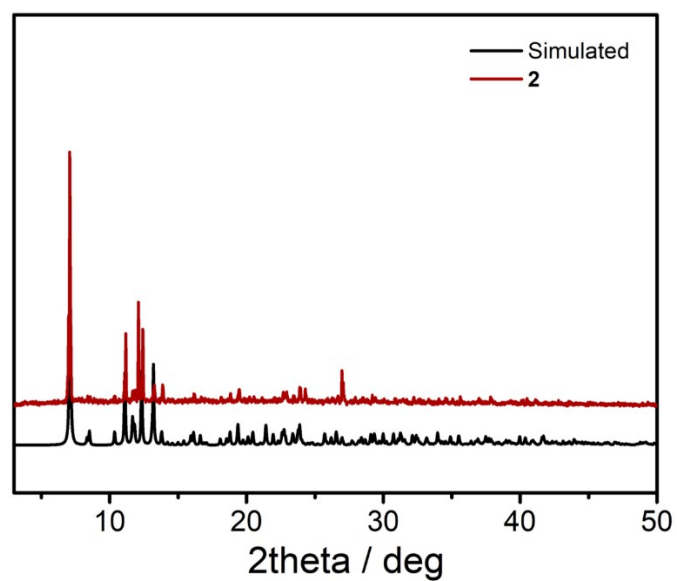

Fig. S5 PXRD pattern of 2.

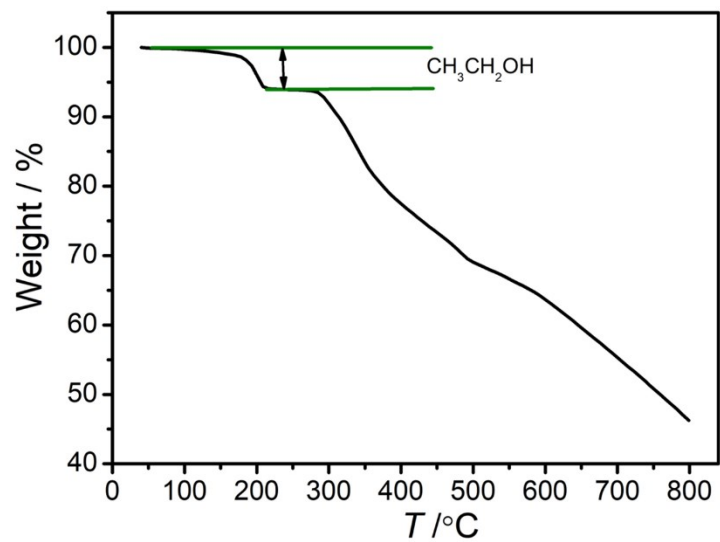

**Fig. S6** TGA of 1.

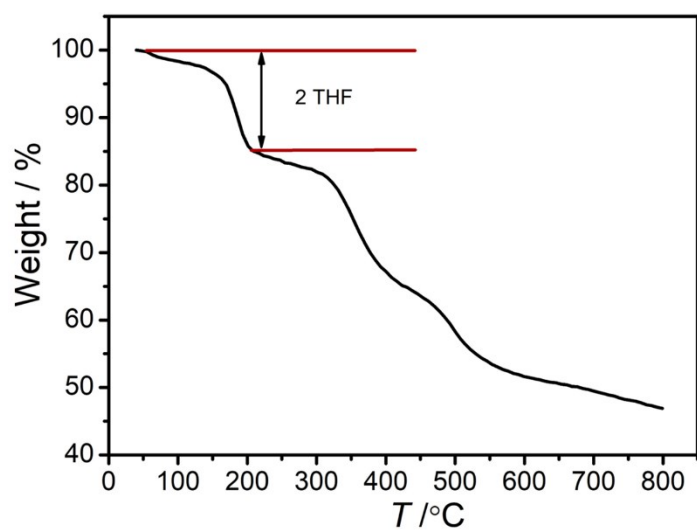

**Fig. S7** TGA of 2.



## S4. Magnetic Characterizations

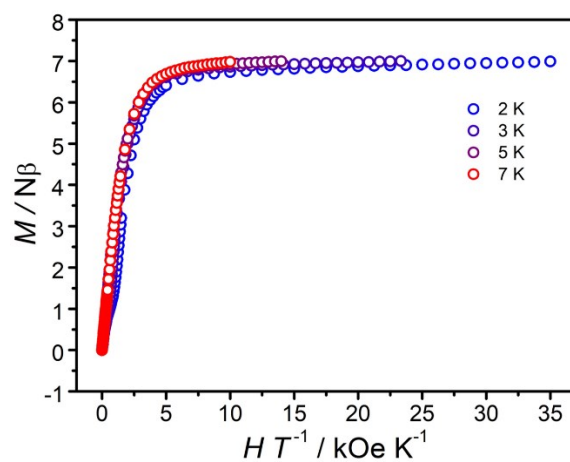

Fig. S8 Plots of the  $M$  vs.  $H/T$  of **1**.

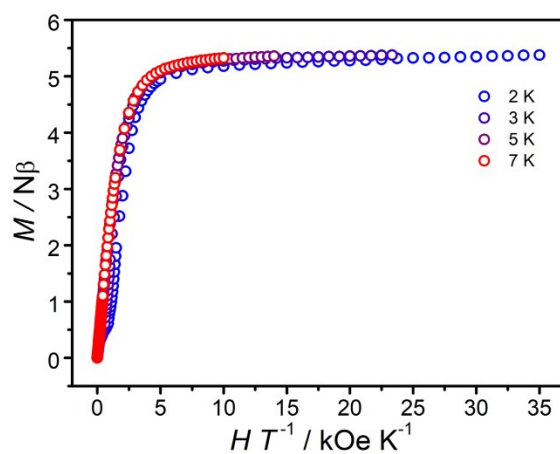

Fig. S9 Plots of the  $M$  vs.  $H/T$  of **2**.

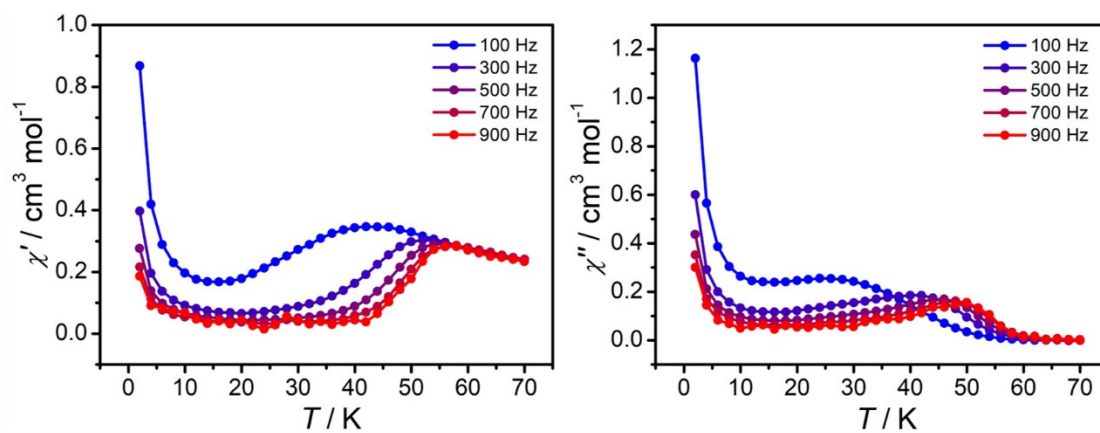

Fig. S10 Ac magnetic susceptibilities vs. temperature at given frequencies for **1** at  $H_{dc} = 0$  Oe and  $H_{ac} = 3$  Oe.

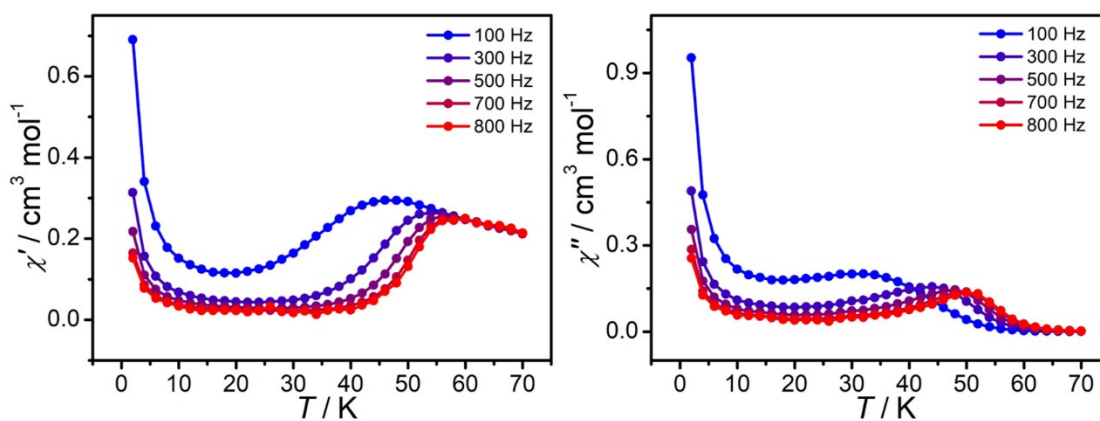

**Fig. S11** Ac magnetic susceptibilities vs. temperature at given frequencies for **2** at  $H_{dc} = 0$  Oe and  $H_{ac} = 3$  Oe.

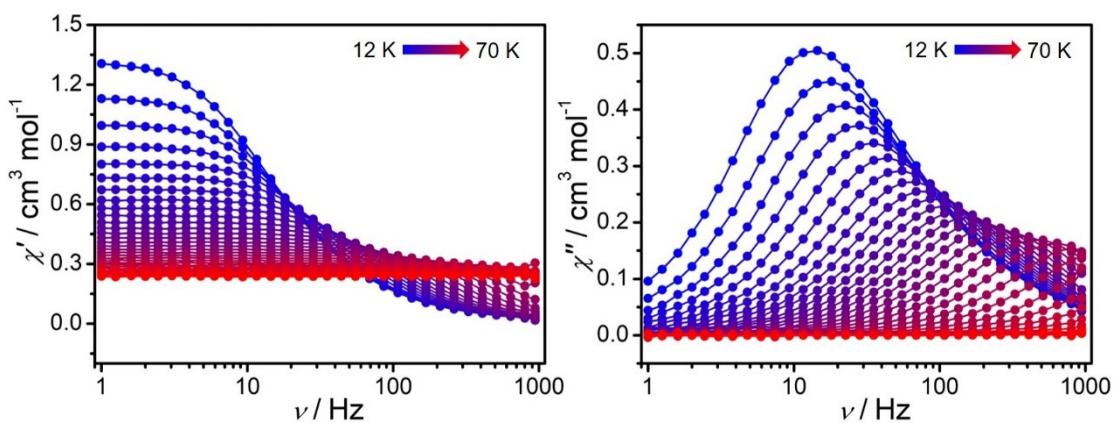

**Fig. S12** Frequency dependence of ac susceptibilities of **1** at  $H_{dc} = 0$  Oe and  $H_{ac} = 3$  Oe.

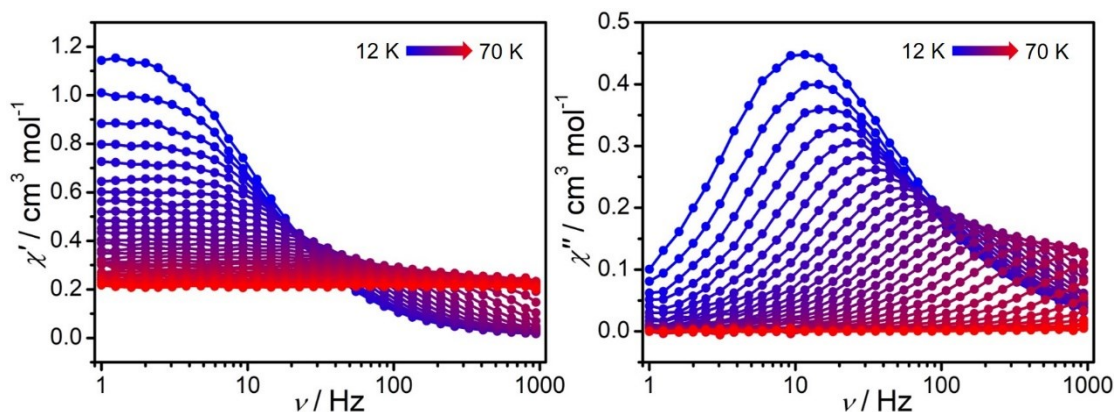

**Fig. S13** Frequency dependence of ac susceptibilities of **2** at  $H_{dc} = 0$  Oe and  $H_{ac} = 3$  Oe.

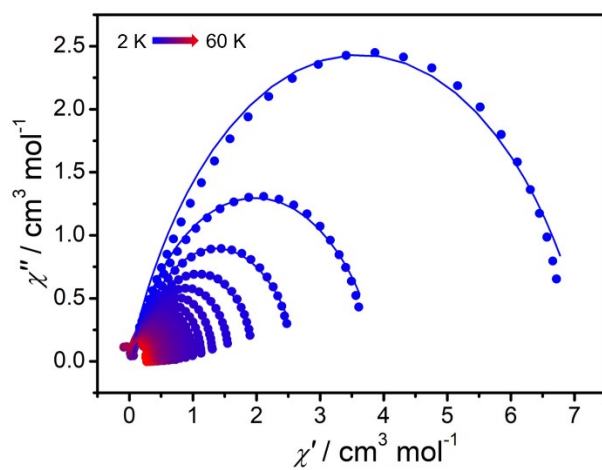

**Fig. S14** Cole-Cole plots of 1.

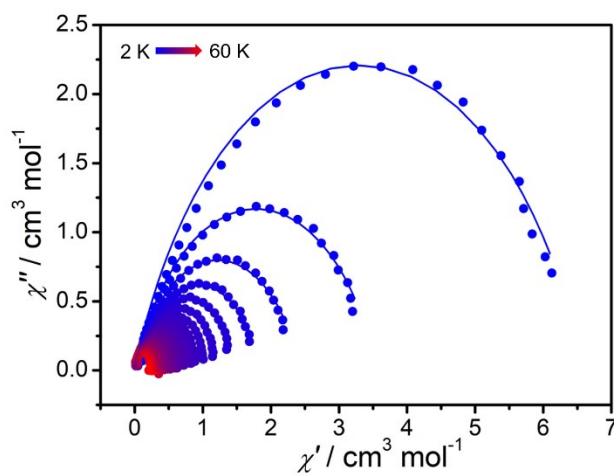

**Fig. S15** Cole-Cole plots of 2.

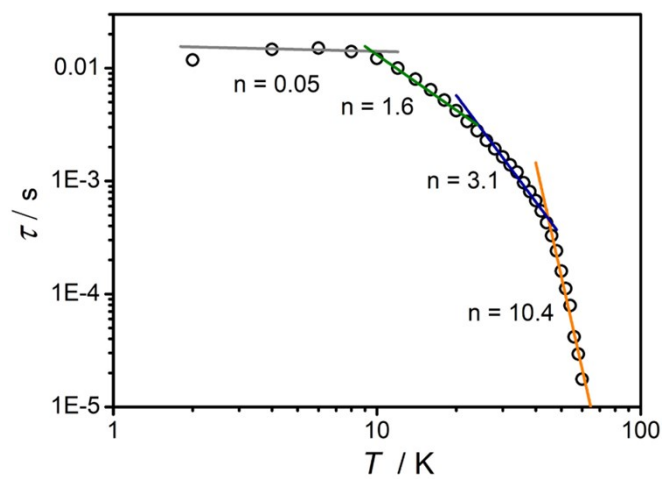

**Fig. S16** The  $\tau$  versus  $T^n$  plot in a log-log scale for **1**.

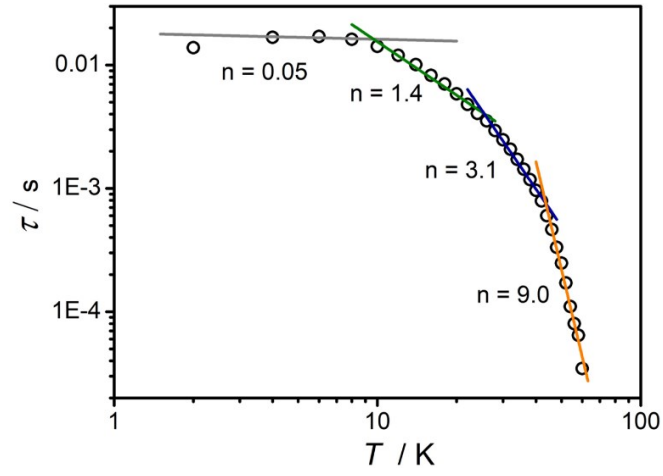

**Fig. S17** The  $\tau$  versus  $T^n$  plot in a log-log scale for **2**.

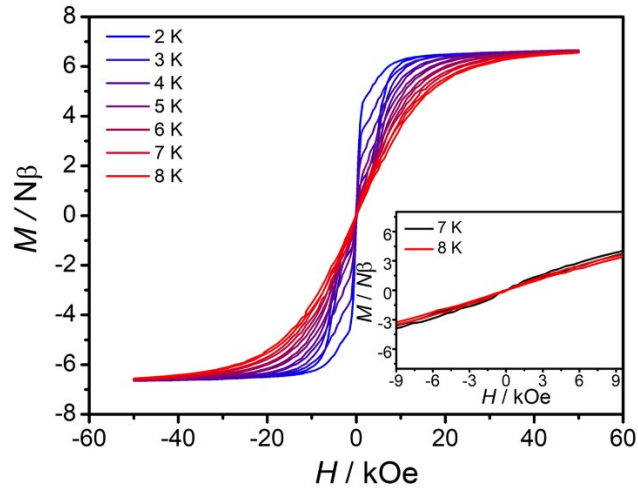

**Fig. S18** Magnetic hysteresis loops of **1** at a field sweep rate of  $0.02 \text{ T s}^{-1}$ .

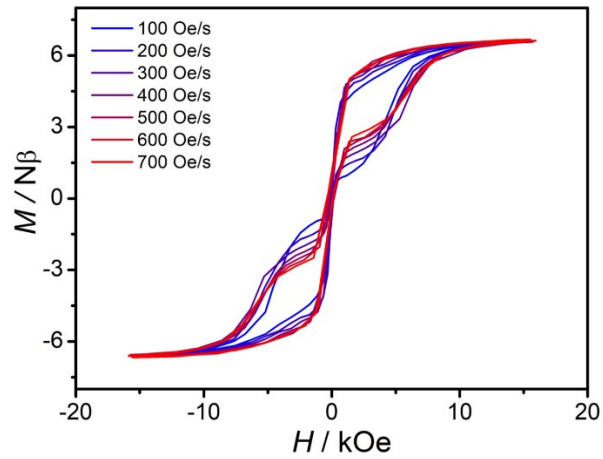

**Fig. S19** Magnetic hysteresis loops of **1** at the indicated field sweep rates and at 2 K.

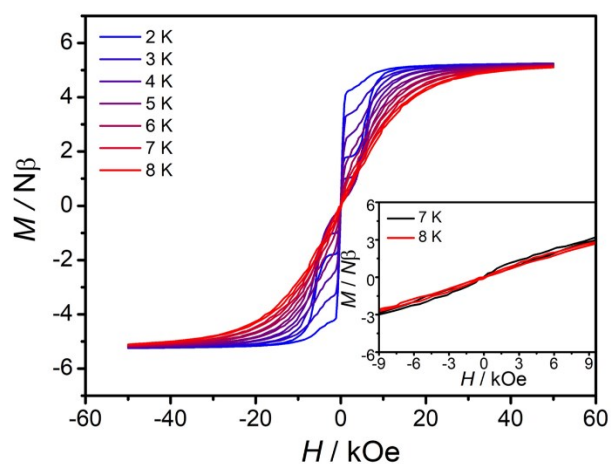

**Fig. S20** Magnetic hysteresis loops of **2** at a field sweep rate of 0.02 T Oe s<sup>-1</sup>.

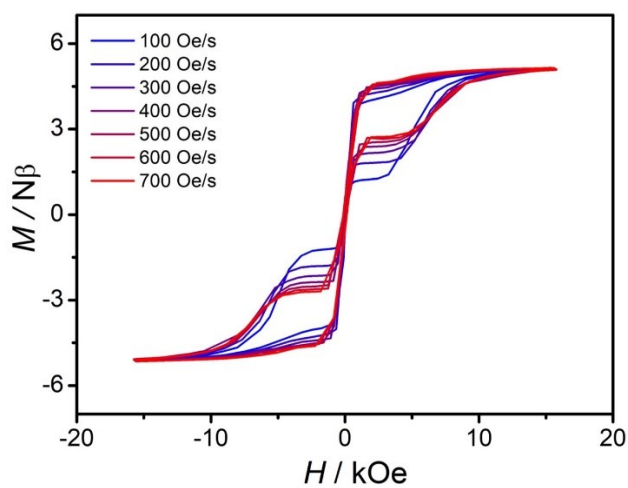

**Fig. S21** Magnetic hysteresis loops of **2** at the indicated field sweep rates and at 2 K.

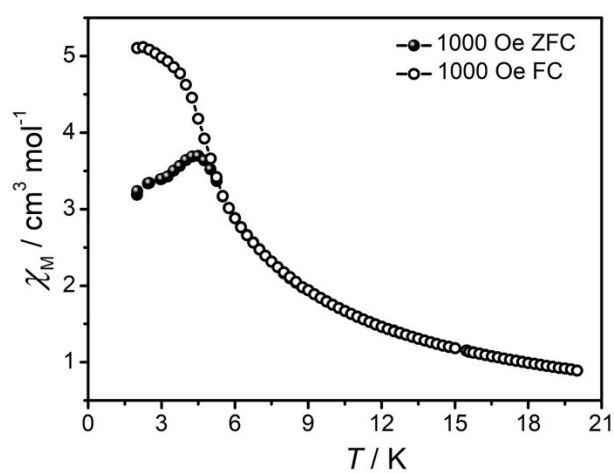

**Fig. S22** FC/ZFC magnetizations at 1000 Oe for **1**.

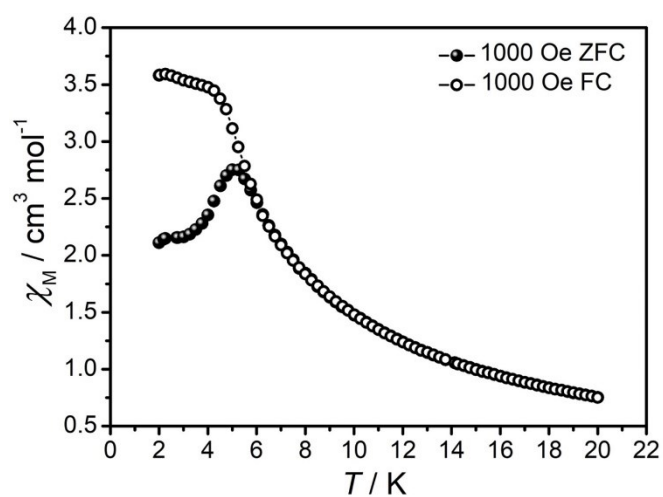

Fig. S23 FC/ZFC magnetizations at 1000 Oe for 2.

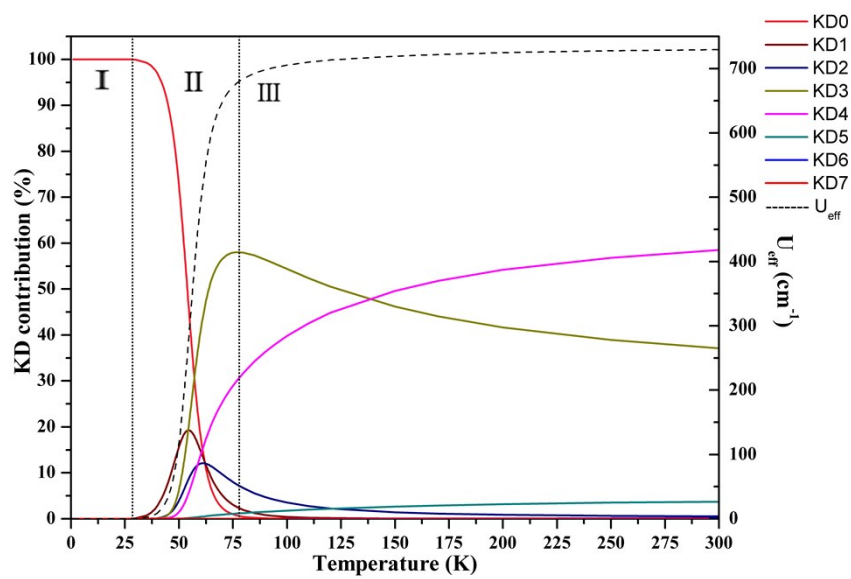

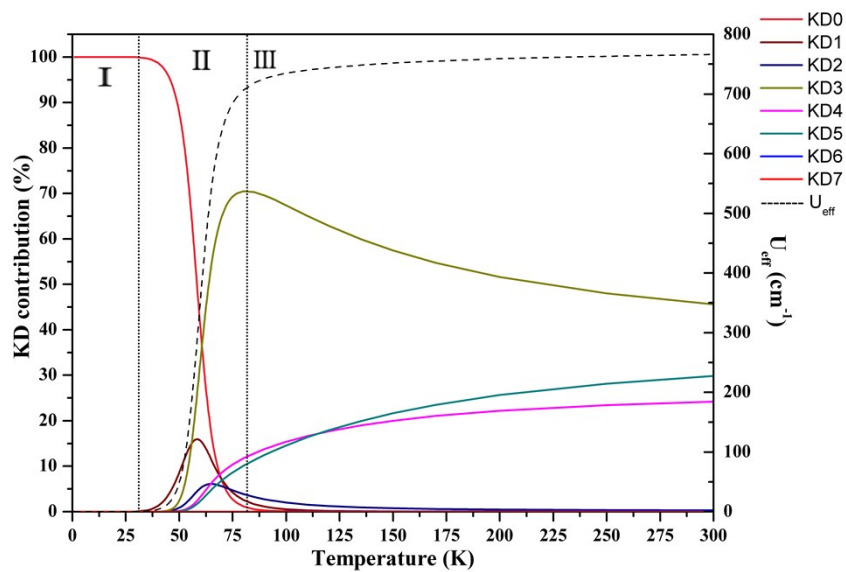

**Fig. S24** Predicted effective barrier and relaxation contributions from various KDs of **1** (up) and **2** (down).  $U_{\text{eff}}$  is represented as a dashed black line, and its value is indicated on the right  $y$ -axis. The left  $y$ -axis represents the relative contribution of each KD to relaxation.

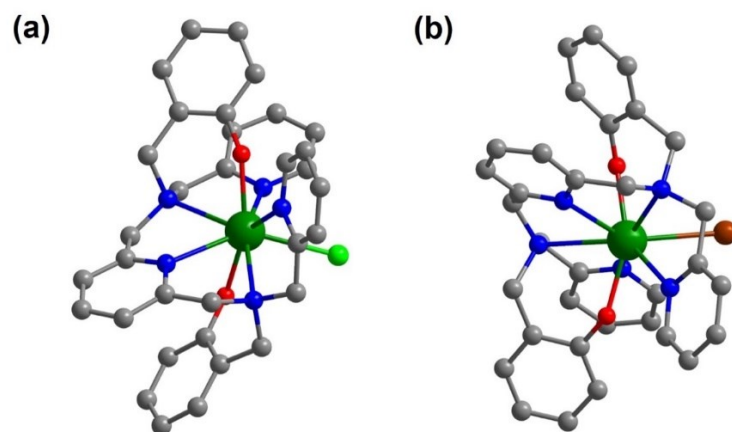

**Fig. S25** Calculated complete structures of **1** (a) and **2** (b); Color code: Dy (green), O (red), N (blue), C (grey), Cl (bright green), Br (sorrel). Hydrogen atoms are omitted for clarity.

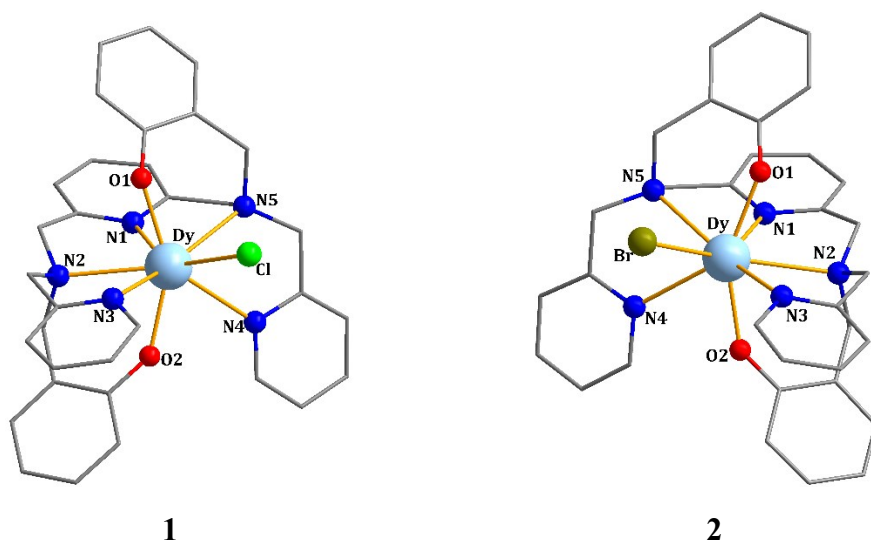

**Fig. S26** Labeled molecular structures for **1** and **2**.



## S5. Tables

**Table S1** Crystal Data and Structure Refinement Details of **1** and **2**.

| Compounds                                                | 1                                                                 | 2                                                                 |
|----------------------------------------------------------|-------------------------------------------------------------------|-------------------------------------------------------------------|
| Formula                                                  | C <sub>34</sub> H <sub>36</sub> ClDyN <sub>5</sub> O <sub>3</sub> | C <sub>37</sub> H <sub>39</sub> BrDyN <sub>5</sub> O <sub>3</sub> |
| Formula wt                                               | 750.61                                                            | 844.14                                                            |
| Temperature (K)                                          | 293                                                               | 293                                                               |
| Crystal System                                           | orthorhombic                                                      | orthorhombic                                                      |
| Space Group                                              | Pbca                                                              | Pbca                                                              |
| a (Å)                                                    | 14.8133(4)                                                        | 18.7957(8)                                                        |
| b (Å)                                                    | 24.4403(7)                                                        | 14.9643(6)                                                        |
| c (Å)                                                    | 18.4864(5)                                                        | 24.8780(13)                                                       |
| α (deg)                                                  | 90                                                                | 90                                                                |
| β (deg)                                                  | 90                                                                | 90                                                                |
| γ (deg)                                                  | 90                                                                | 90                                                                |
| Z                                                        | 8                                                                 | 8                                                                 |
| V (Å <sup>3</sup> )                                      | 6692.8(3)                                                         | 6997.3(5)                                                         |
| ρ <sub>calc</sub> (g/cm <sup>3</sup> )                   | 1.490                                                             | 1.603                                                             |
| μ (mm <sup>-1</sup> )                                    | 2.351                                                             | 3.321                                                             |
| F(000)                                                   | 3008.0                                                            | 3368.0                                                            |
| R <sub>int</sub>                                         | 0.0521                                                            | 0.0879                                                            |
| Goodness-of-fit on F <sup>2</sup>                        | 1.041                                                             | 0.981                                                             |
| R <sub>1</sub> ,wR <sub>2</sub> (I > 2σ(I)) <sup>a</sup> | 0.0494, 0.1313                                                    | 0.0532, 0.1185                                                    |
| R <sub>1</sub> ,wR <sub>2</sub> (all data) <sup>b</sup>  | 0.0601, 0.1371                                                    | 0.1047, 0.1399                                                    |

$${}^a R_1 = \frac{\sum ||F_o| - |F_c||}{\sum |F_o|}, \quad {}^b wR_2 = \frac{|\sum w(|F_o|^2 - |F_c|^2)|}{\sum |w(F_o)^2|^{1/2}}$$

**Table S2** Selected Bond Lengths (Å) and Bond Angles (deg) for **1** and **2**.

| <b>1</b>                           |            |        |            | <b>2</b>                           |          |        |          |
|------------------------------------|------------|--------|------------|------------------------------------|----------|--------|----------|
| <b>Bond Lengths around Dy1 (Å)</b> |            |        |            | <b>Bond Lengths around Dy1 (Å)</b> |          |        |          |
| Dy1-O1                             | 2.225(4)   | Dy1-N2 | 2.657(5)   | Dy1-O1                             | 2.196(5) | Dy1-N2 | 2.664(6) |
| Dy1-O2                             | 2.186(4)   | Dy1-N3 | 2.649(5)   | Dy1-O2                             | 2.226(5) | Dy1-N3 | 2.701(6) |
| Dy1-Cl1                            | 2.710(2)   | Dy1-N4 | 2.629(5)   | Dy1-Br1                            | 2.875(1) | Dy1-N4 | 2.673(6) |
| Dy1-N1                             | 2.559(5)   | Dy1-N5 | 2.696(5)   | Dy1-N1                             | 2.574(6) | Dy1-N5 | 2.620(6) |
| <b>Bond angles around Dy1 (°)</b>  |            |        |            | <b>Bond angles around Dy1 (°)</b>  |          |        |          |
| O1-Dy1-O2                          | 150.35(15) |        | O1-Dy1-O2  | 150.10(17)                         |          |        |          |
| O1-Dy1-Cl1                         | 88.10(11)  |        | O1-Dy1-Br1 | 88.07(12)                          |          |        |          |
| O1-Dy1-N1                          | 72.28(15)  |        | O1-Dy1-N1  | 72.21(19)                          |          |        |          |
| O1-Dy1-N2                          | 79.77(14)  |        | O1-Dy1-N2  | 78.10(19)                          |          |        |          |
| O1-Dy1-N3                          | 78.42(15)  |        | O1-Dy1-N3  | 139.66(19)                         |          |        |          |
| O1-Dy1-N4                          | 87.99(16)  |        | O1-Dy1-N4  | 78.72(18)                          |          |        |          |
| O1-Dy1-N5                          | 140.03(15) |        | O1-Dy1-N5  | 87.79(19)                          |          |        |          |
| O2-Dy1-Cl1                         | 107.99(13) |        | O2-Dy1-Br1 | 108.56(13)                         |          |        |          |
| O2-Dy1-N1                          | 104.51(16) |        | O2-Dy1-N1  | 104.03(19)                         |          |        |          |
| O2-Dy1-N2                          | 72.50(15)  |        | O2-Dy1-N2  | 128.21(19)                         |          |        |          |
| O2-Dy1-N3                          | 127.98(16) |        | O2-Dy1-N3  | 69.42(19)                          |          |        |          |
| O2-Dy1-N4                          | 71.38(16)  |        | O2-Dy1-N4  | 73.06(18)                          |          |        |          |
| O2-Dy1-N5                          | 68.95(15)  |        | O2-Dy1-N5  | 71.85(19)                          |          |        |          |

Symmetry operation codes: #1 0.5-X, -Y, 0.5+Z; #2 -X, 0.5+Y, 0.5-Z; #3 0.5+X, 0.5-Y, -Z.

**Table S3** Symmetries and Deviated CSM Parameters for **1**.

| <b>Label</b>    | <b>Shape</b>                                  | <b>Symmetry</b> | <b>Deviated value</b> |
|-----------------|-----------------------------------------------|-----------------|-----------------------|
| <b>OP-8</b>     | Octagon                                       | $D_{8h}$        | 29.553                |
| <b>HPY-8</b>    | Heptagonal pyramid                            | $C_{7v}$        | 20.553                |
| <b>HBPY-8</b>   | Hexagonal bipyramid                           | $D_{6h}$        | 14.412                |
| <b>CU-8</b>     | Cube                                          | $O_h$           | 13.340                |
| <b>SAPR-8</b>   | Square antiprism                              | $D_{4d}$        | 6.102                 |
| <b>TDD-8</b>    | Triangular dodecahedron                       | $D_{2d}$        | 4.086                 |
| <b>JGBF-8</b>   | Johnson gyrobifastigium J26                   | $D_{2d}$        | 11.391                |
| <b>JETBPY-8</b> | Johnson elongated triangular<br>bipyramid J14 | $D_{3h}$        | 24.775                |
| <b>JBTPR-8</b>  | Biaugmented trigonal prism J50                | $C_{2v}$        | 3.404                 |
| <b>BTPR-8</b>   | Biaugmented trigonal prism                    | $C_{2v}$        | 2.997                 |
| <b>JSD-8</b>    | Snub diphennoid J84                           | $D_{2d}$        | 4.129                 |
| <b>TT-8</b>     | Triakis tetrahedron                           | $T_d$           | 13.997                |
| <b>ETBPY-8</b>  | Elongated trigonal bipyramid                  | $D_{3h}$        | 21.841                |

**Table S4** Symmetries and Deviated CSM Parameters for **2**.

| <b>Label</b>    | <b>Shape</b>                                  | <b>Symmetry</b> | <b>Deviated value</b> |
|-----------------|-----------------------------------------------|-----------------|-----------------------|
| <b>OP-8</b>     | Octagon                                       | $D_{8h}$        | 29.853                |
| <b>HPY-8</b>    | Heptagonal pyramid                            | $C_{7v}$        | 20.629                |
| <b>HBPY-8</b>   | Hexagonal bipyramid                           | $D_{6h}$        | 14.473                |
| <b>CU-8</b>     | Cube                                          | $O_h$           | 13.206                |
| <b>SAPR-8</b>   | Square antiprism                              | $D_{4d}$        | 6.131                 |
| <b>TDD-8</b>    | Triangular dodecahedron                       | $D_{2d}$        | 4.237                 |
| <b>JGBF-8</b>   | Johnson gyrobifastigium J26                   | $D_{2d}$        | 11.679                |
| <b>JETBPY-8</b> | Johnson elongated triangular<br>bipyramid J14 | $D_{3h}$        | 25.267                |
| <b>JBTPR-8</b>  | Biaugmented trigonal prism J50                | $C_{2v}$        | 3.455                 |
| <b>BTPR-8</b>   | Biaugmented trigonal prism                    | $C_{2v}$        | 2.984                 |
| <b>JSD-8</b>    | Snub diphennoid J84                           | $D_{2d}$        | 4.500                 |
| <b>TT-8</b>     | Triakis tetrahedron                           | $T_d$           | 13.671                |
| <b>ETBPY-8</b>  | Elongated trigonal bipyramid                  | $D_{3h}$        | 21.867                |

**Table S5** Debye Model Fitting Parameters for **1** at zero dc field.

| $T / \text{K}$ | $\chi_{\text{S}} / \text{cm}^3 \text{mol}^{-1}$ | $\chi_{\text{T}} / \text{cm}^3 \text{mol}^{-1}$ | $\tau / \text{s}$ | $\alpha$ |
|----------------|-------------------------------------------------|-------------------------------------------------|-------------------|----------|
| 2              | 3.11E-04                                        | 7.24561                                         | 0.01180           | 0.24736  |
| 4              | 3.49E-04                                        | 3.95551                                         | 0.01463           | 0.26068  |
| 6              | 0.05016                                         | 2.68832                                         | 0.01503           | 0.23939  |
| 8              | 0.04414                                         | 2.04733                                         | 0.01400           | 0.22804  |
| 10             | 0.0429                                          | 1.64485                                         | 0.01217           | 0.20323  |
| 12             | 0.04173                                         | 1.36885                                         | 0.00997           | 0.17306  |
| 14             | 0.0396                                          | 1.16961                                         | 0.00799           | 0.14483  |
| 16             | 0.03568                                         | 1.02388                                         | 0.00643           | 0.12285  |
| 18             | 0.03018                                         | 0.90844                                         | 0.00521           | 0.10729  |
| 20             | 0.02863                                         | 0.81652                                         | 0.00420           | 0.09234  |
| 22             | 0.02512                                         | 0.74254                                         | 0.00337           | 0.08443  |
| 24             | 0.02979                                         | 0.67962                                         | 0.00279           | 0.06895  |
| 26             | 0.02163                                         | 0.62729                                         | 0.00229           | 0.0668   |
| 28             | 0.01925                                         | 0.58378                                         | 0.00193           | 0.06127  |
| 30             | 0.01768                                         | 0.54475                                         | 0.00164           | 0.05314  |
| 32             | 0.01665                                         | 0.51072                                         | 0.00139           | 0.04549  |
| 34             | 0.02064                                         | 0.48028                                         | 0.00120           | 0.03172  |
| 36             | 6.48E-10                                        | 0.45419                                         | 9.66236E-4        | 0.03970  |
| 38             | 8.42E-10                                        | 0.43228                                         | 8.08729E-4        | 0.05058  |
| 40             | 1.51E-09                                        | 0.40882                                         | 6.70358E-4        | 0.02451  |
| 42             | 1.86E-09                                        | 0.39055                                         | 5.42352E-4        | 0.03156  |
| 44             | 2.46E-09                                        | 0.37369                                         | 4.28914E-4        | 0.03243  |
| 46             | 1.75E-09                                        | 0.35749                                         | 3.2887E-4         | 0.02819  |
| 48             | 1.85E-09                                        | 0.34314                                         | 2.41303E-4        | 0.02773  |
| 50             | 2.41E-09                                        | 0.33047                                         | 1.59601E-4        | 0.04306  |
| 52             | 3.63E-09                                        | 0.31706                                         | 1.11793E-4        | 0.01746  |
| 54             | 5.42E-09                                        | 0.30518                                         | 7.89742E-5        | 0.01682  |

**Table S6** Debye Model Fitting Parameters for **2** at zero dc field.

| $T / \text{K}$ | $\chi_{\text{S}} / \text{cm}^3 \text{mol}^{-1}$ | $\chi_{\text{T}} / \text{cm}^3 \text{mol}^{-1}$ | $\tau / \text{s}$ | $\alpha$ |
|----------------|-------------------------------------------------|-------------------------------------------------|-------------------|----------|
| 2              | 1.80845E-7                                      | 6.58909                                         | 0.01384           | 0.24795  |
| 4              | 2.07528E-7                                      | 3.56722                                         | 0.01681           | 0.26060  |
| 6              | 2.55278E-7                                      | 2.44071                                         | 0.01711           | 0.26153  |
| 8              | 3.23813E-7                                      | 1.86359                                         | 0.01616           | 0.25336  |
| 10             | 2.30531E-7                                      | 1.50000                                         | 0.01422           | 0.23511  |
| 12             | 3.87191E-7                                      | 1.24472                                         | 0.01201           | 0.21286  |
| 14             | 5.98271E-7                                      | 1.06916                                         | 0.01008           | 0.19037  |
| 16             | 1.05093E-6                                      | 0.92543                                         | 0.00826           | 0.16386  |
| 18             | 1.85118E-6                                      | 0.83394                                         | 0.00703           | 0.15382  |
| 20             | 3.23353E-6                                      | 0.74514                                         | 0.00584           | 0.13431  |
| 22             | 5.83673E-6                                      | 0.66938                                         | 0.00481           | 0.11415  |
| 24             | 1.06213E-5                                      | 0.61713                                         | 0.00406           | 0.10699  |
| 26             | 0.01727                                         | 0.56578                                         | 0.00353           | 0.06873  |
| 28             | 0.01548                                         | 0.52467                                         | 0.00295           | 0.05887  |
| 30             | 0.01383                                         | 0.49087                                         | 0.00248           | 0.05581  |
| 32             | 0.01114                                         | 0.46243                                         | 0.00208           | 0.05658  |
| 34             | 0.01203                                         | 0.43005                                         | 0.00172           | 0.03893  |
| 36             | 0.00999                                         | 0.40736                                         | 0.00143           | 0.03876  |
| 38             | 0.00808                                         | 0.38812                                         | 0.00118           | 0.04175  |
| 40             | 0.00722                                         | 0.37000                                         | 9.62256E-4        | 0.03953  |
| 42             | 0.01932                                         | 0.34680                                         | 7.92967E-4        | 0.00280  |
| 44             | 0.00907                                         | 0.33231                                         | 6.01415E-4        | 0.01808  |
| 46             | 0.01013                                         | 0.31971                                         | 4.63649E-4        | 0.01808  |
| 48             | 0.00566                                         | 0.30613                                         | 3.32397E-4        | 0.01731  |
| 50             | 0.01531                                         | 0.29536                                         | 2.4753E-4         | 0.00732  |
| 52             | 0.0238                                          | 0.28441                                         | 1.71024E-4        | 0.00631  |

**Table S7** Calculated energy levels ( $\text{cm}^{-1}$ ),  $\mathbf{g}$  ( $g_x, g_y, g_z$ ) tensors and predominant  $m_J$  values of the lowest eight KDs of **1** and **2** using CASSCF/RASSI-SO<sup>3</sup> with MOLCAS 8.4<sup>2</sup>.

| KDs | <b>1</b>           |              |            | <b>2</b>           |              |            |
|-----|--------------------|--------------|------------|--------------------|--------------|------------|
|     | $E/\text{cm}^{-1}$ | $\mathbf{g}$ | $m_J$      | $E/\text{cm}^{-1}$ | $\mathbf{g}$ | $m_J$      |
| 1   | 0.0                | 0.001        | $\pm 15/2$ | 0.0                | 0.001        | $\pm 15/2$ |
|     |                    | 0.001        |            |                    | 0.001        |            |
|     |                    | 19.869       |            |                    | 19.866       |            |
| 2   | 278.3              | 0.028        | $\pm 13/2$ | 287.5              | 0.016        | $\pm 13/2$ |
|     |                    | 0.035        |            |                    | 0.020        |            |
|     |                    | 17.081       |            |                    | 17.091       |            |
| 3   | 521.6              | 0.405        | $\pm 11/2$ | 539.7              | 0.185        | $\pm 11/2$ |
|     |                    | 0.542        |            |                    | 0.214        |            |
|     |                    | 14.001       |            |                    | 14.133       |            |
| 4   | 678.9              | 4.008        | $\pm 9/2$  | 710.6              | 3.036        | $\pm 9/2$  |
|     |                    | 6.218        |            |                    | 3.958        |            |
|     |                    | 8.638        |            |                    | 10.112       |            |
| 5   | 758.9              | 9.150        | $\pm 5/2$  | 798.7              | 0.887        | $\pm 5/2$  |
|     |                    | 6.450        |            |                    | 3.929        |            |
|     |                    | 1.146        |            |                    | 8.138        |            |
| 6   | 795.8              | 1.342        | $\pm 1/2$  | 826.2              | 1.560        | $\pm 1/2$  |
|     |                    | 3.239        |            |                    | 5.694        |            |
|     |                    | 14.026       |            |                    | 12.521       |            |
| 7   | 854.1              | 0.340        | $\pm 3/2$  | 883.1              | 0.161        | $\pm 3/2$  |
|     |                    | 0.650        |            |                    | 0.403        |            |
|     |                    | 17.711       |            |                    | 17.749       |            |
| 8   | 970.2              | 0.046        | $\pm 7/2$  | 987.4              | 0.084        | $\pm 7/2$  |
|     |                    | 0.099        |            |                    | 0.188        |            |
|     |                    | 19.439       |            |                    | 19.371       |            |

**Table S8** Wave functions with definite projection of the total moment  $|m_J\rangle$  for the lowest eight KDs for **1** and **2** and the included  $\theta$  angles of magnetic axes between the excited KD and the ground KD.

| $E/\text{cm}^{-1}$ | wave functions                                                                                                                 | $\theta/\text{degree}$ |
|--------------------|--------------------------------------------------------------------------------------------------------------------------------|------------------------|
| 0.0                | 99.7% $ \pm 15/2\rangle$                                                                                                       | 0.0                    |
| 278.3              | 97.2% $ \pm 13/2\rangle$                                                                                                       | 6.3                    |
| 521.6              | 87.1% $ \pm 11/2\rangle$ +5.3% $ \pm 9/2\rangle$                                                                               | 8.5                    |
| 678.9              | 55.9% $ \pm 9/2\rangle$ +14.5% $ \pm 5/2\rangle$ +12.0% $ \pm 7/2\rangle$ +8.7% $ \pm 3/2\rangle$                              | 19.6                   |
| 758.9              | 28.6% $ \pm 1/2\rangle$ +22.2% $ \pm 7/2\rangle$ +17.4% $ \pm 3/2\rangle$ +16.9% $ \pm 5/2\rangle$<br>+10.5% $ \pm 9/2\rangle$ | 20.7                   |
| 795.8              | 28.8% $ \pm 3/2\rangle$ +27.8% $ \pm 1/2\rangle$ +17.6% $ \pm 7/2\rangle$ +12.6% $ \pm 5/2\rangle$<br>+12.2% $ \pm 9/2\rangle$ | 91.4                   |
| 854.1              | 25.8% $ \pm 1/2\rangle$ +25.6% $ \pm 5/2\rangle$ +24.8% $ \pm 3/2\rangle$ +17.7% $ \pm 7/2\rangle$                             | 97.5                   |
| 970.2              | 30.0% $ \pm 5/2\rangle$ +26.2% $ \pm 7/2\rangle$ +19.9% $ \pm 3/2\rangle$ +12.0% $ \pm 1/2\rangle$<br>+10.1% $ \pm 9/2\rangle$ | 70.5                   |
| <hr/>              |                                                                                                                                |                        |
| 0.0                | 99.7% $ \pm 15/2\rangle$                                                                                                       | 0.0                    |
| 287.5              | 97.6% $ \pm 13/2\rangle$                                                                                                       | 5.9                    |
| 539.7              | 89.1% $ \pm 11/2\rangle$ +4.9% $ \pm 9/2\rangle$                                                                               | 8.5                    |
| 710.6              | 65.0% $ \pm 9/2\rangle$ +13.1% $ \pm 7/2\rangle$ +11.0% $ \pm 5/2\rangle$ +6.4% $ \pm 3/2\rangle$                              | 17.0                   |
| 798.7              | 28.6% $ \pm 7/2\rangle$ +27.6% $ \pm 5/2\rangle$ +24.4% $ \pm 1/2\rangle$ +9.5% $ \pm 3/2\rangle$                              | 56.5                   |
| 826.2              | 39.0% $ \pm 3/2\rangle$ +35.7% $ \pm 1/2\rangle$ +12.5% $ \pm 7/2\rangle$ +7.4% $ \pm 9/2\rangle$                              | 94.2                   |
| 883.1              | 28.1% $ \pm 1/2\rangle$ +25.2% $ \pm 3/2\rangle$ +25.0% $ \pm 5/2\rangle$ +15.5% $ \pm 7/2\rangle$                             | 82.6                   |
| 987.4              | 31.6% $ \pm 5/2\rangle$ +26.7% $ \pm 7/2\rangle$ +19.7% $ \pm 3/2\rangle$ +10.5% $ \pm 1/2\rangle$<br>+9.7% $ \pm 9/2\rangle$  | 70.2                   |



**Table S9** Calculated crystal-field parameters  $B(k,q)$  for **1** and **2**.

|   | $k$ | $q$                      | <b>1</b>                 | <b>2</b>                 |
|---|-----|--------------------------|--------------------------|--------------------------|
|   |     | -2                       | $0.1147 \times 10^1$     | -0.9657                  |
|   |     | -1                       | $0.1706 \times 10^1$     | $0.1709 \times 10^1$     |
|   | 2   | 0                        | $-0.4951 \times 10^1$    | $-0.5168 \times 10^1$    |
|   |     | 1                        | $0.1862 \times 10^1$     | $-0.1804 \times 10^1$    |
|   |     | 2                        | $0.1526 \times 10^1$     | $0.1416 \times 10^1$     |
|   |     | -4                       | $0.3642 \times 10^{-2}$  | $-0.5161 \times 10^{-2}$ |
|   |     | -3                       | $0.2070 \times 10^{-1}$  | $0.2054 \times 10^{-2}$  |
|   |     | -2                       | $-0.4883 \times 10^{-2}$ | $0.9662 \times 10^{-1}$  |
|   |     | -1                       | $-0.7287 \times 10^{-2}$ | $-0.7316 \times 10^{-3}$ |
|   | 4   | 0                        | $-0.6758 \times 10^{-2}$ | $-0.6685 \times 10^{-2}$ |
|   |     | 1                        | $-0.9325 \times 10^{-2}$ | $0.9809 \times 10^{-2}$  |
|   |     | 2                        | $0.8572 \times 10^{-2}$  | $0.8713 \times 10^{-2}$  |
|   |     | 3                        | $0.1135 \times 10^{-1}$  | $0.1205 \times 10^{-2}$  |
|   |     | 4                        | $0.6426 \times 10^{-2}$  | $0.1595 \times 10^{-2}$  |
|   | -6  | $-0.2118 \times 10^{-3}$ | $0.1420 \times 10^{-3}$  |                          |
|   | -5  | $0.6296 \times 10^{-3}$  | $0.5891 \times 10^{-3}$  |                          |
|   | -4  | $-0.1012 \times 10^{-3}$ | $0.8821 \times 10^{-4}$  |                          |
|   | -3  | $-0.6822 \times 10^{-4}$ | $0.5878 \times 10^{-5}$  |                          |
|   | -2  | $-0.9579 \times 10^{-4}$ | $0.1220 \times 10^{-3}$  |                          |
|   | -1  | $-0.8116 \times 10^{-4}$ | $-0.8224 \times 10^{-4}$ |                          |
| 6 | 0   | $0.2856 \times 10^{-4}$  | $0.2829 \times 10^{-4}$  |                          |
|   | 1   | $-0.4661 \times 10^{-4}$ | $0.3775 \times 10^{-4}$  |                          |
|   | 2   | $-0.8074 \times 10^{-4}$ | $-0.5138 \times 10^{-4}$ |                          |
|   | 3   | $0.1360 \times 10^{-3}$  | $-0.1344 \times 10^{-3}$ |                          |
|   | 4   | $-0.6935 \times 10^{-5}$ | $0.6124 \times 10^{-4}$  |                          |
|   | 5   | $0.3077 \times 10^{-3}$  | $0.2704 \times 10^{-3}$  |                          |
|   | 6   | $-0.4796 \times 10^{-4}$ | $0.1537 \times 10^{-3}$  |                          |

**Table S10** Calculated LoProp charges per atoms in the ground state of **1** and **2** using CASSCF/RASSI with MOLCAS 8.4.

|            |         | <b>1</b> |         | <b>2</b> |
|------------|---------|----------|---------|----------|
| Easy axis  | Dy      | 2.440    | Dy      | 2.426    |
|            | O1      | -0.911   | O1      | -0.919   |
|            | O2      | -0.933   | O2      | -0.935   |
|            | Average | -0.922   | Average | -0.927   |
|            | e       |          | e       |          |
| Hard plane | N1      | -0.386   | N1      | -0.382   |
|            | N2      | -0.308   | N2      | -0.310   |
|            | N3      | -0.352   | N3      | -0.353   |
|            | N4      | -0.350   | N4      | -0.355   |
|            | N5      | -0.316   | N5      | -0.315   |
|            | Cl      | -0.196   | Br      | -0.865   |
|            | Average | -0.318   | Average | -0.430   |
|            | e       |          | e       |          |

## S6. References

- 1 (a) G. M. Sheldrick, *SHELXL-97, Program for Refinement of Crystal Structures*, University of Göttingen: Göttingen, Germany, 1997; (b) Sheldrick, G. M., *SHELXS-97, Program for Solution of Crystal Structures*, University of Göttingen: Göttingen, Germany, 1997; (c) G. M. Sheldrick, A short history of *SHELX*, *Acta Crystallogr., Sect. A: Found. Crystallogr.*, 2008, **64**, 112–; (d) O. V. Dolomanov, L. J. Bourhis, R. J. Gildea, J. A. K. Howard and H. Puschmann, OLEX2: a complete structure solution, refinement and analysis program, *J. Appl. Cryst.*, 2009, **42**, 339–341; (e) G. M. Sheldrick, High-pressure synchrotron radiation crystallography, from organic conductors to chemistry in the lower mantle, *Acta Crystallogr., Sect. C: Struct. Chem.*, 2015, **71**, 3.
- 2 F. Aquilante, J. Autschbach, R. K. Carlson, L. F. Chibotaru, M. G. Delcey, L. De Vico, I. Fdez. Galván, N. Ferré, L. M. Frutos, L. Gagliardi, M. Garavelli, A. Giussani, C. E. Hoyer, G. Li Manni, H. Lischka, D. Ma, P. Å. Malmqvist, T. Müller, A. Nenov, M. Olivucci, T. B. Pedersen, D. Peng, F. Plasser, B. Pritchard, M. Reiher, I. Rivalta, I. Schapiro, J. Segarra-Martí, M. Stenrup, D. G. Truhlar,

- L. Ungur, A. Valentini, S. Vancoillie, V. Veryazov, V. P. Vysotskiy, O. Weingart, F. Zapata and R. Lindh, MOLCAS 8: New Capabilities for Multiconfigurational Quantum Chemical Calculations across the Periodic Table, *J. Comput. Chem.*, 2016, **37**, 506–541.
- 3 (a) L. F. Chibotaru, L. Ungur and A. Soncini, The Origin of Nonmagnetic Kramers Doublets in the Ground State of Dysprosium Triangles: Evidence for a Toroidal Magnetic Moment, *Angew. Chem. Int. Ed.*, 2008, **47**, 4126–4129; (b) L. Ungur, W. Van den Heuvel and L. F. Chibotaru, Ab initio investigation of the non-collinear magnetic structure and the lowest magnetic excitations in dysprosium triangles, *New J. Chem.*, 2009, **33**, 1224–1230; (c) L. F. Chibotaru, L. Ungur, C. Aronica, H. Elmoll, G. Pilet and D. Luneau, Structure, Magnetism, and Theoretical Study of a Mixed-Valence  $\text{Co}^{\text{II}}_3\text{Co}^{\text{III}}_4$  Heptanuclear Wheel: Lack of SMM Behavior despite Negative Magnetic Anisotropy, *J. Am. Chem. Soc.*, 2008, **130**, 12445–12455.
- 4 (a) X. L. Liu, Z. H. Wei, B. B. Xu and X. M. Liu, A heptadentate ligand possessing two phenol groups: Its diverse coordination chemistry and the catalytic behaviours of its transition complexes towards benzene oxidation, *Polyhedron*, 2014, **81**, 743–748; (b) X. L. You, Z. H. Wei, H. L. Wang, D. P. Li, J. Liu, B. B. Xu and X. M. Liu, Synthesis of two copper clusters and their catalysis towards the oxidation of benzene into phenol, *RSC Adv.*, 2014, **4**, 61790–61798.
